# Supplementary material
Source: Research Square preprint supplement (doi:10.21203/rs.3.rs-10000099/v1)
Supplement: Supplementary file 1 [file 7a042544c83a001289620d17.docx]

|  |  | **Neck** | | | |  | **Shoulders** | | | |
| --- | --- | --- | --- | --- | --- | --- | --- | --- | --- | --- |
| **Parameters** | **Categories** | MSD-12M  OR (95%IC) | P-value | MSD-7d  OR (95%IC) | P-value |  | MSD-12M  OR (95%IC) | P-value | MSD-7d  OR (95%IC) | P-value |
| **Profession** | Nurses | 1 |  | 1 |  |  | 1 |  | 1 |  |
| MHT | 1.36(0.84-2.21) | 0.722 | 0.59(0.32-1.09) | 0.097 |  | 0.77(0.41-1.48) | 0.441 | 0.66(0.15-2.91) | 0.582 |
|  |  |  |  |  |  |  |  |  |  |  |
| **Gender** | Females | 1 |  | 1 |  |  | 1 |  | 1 |  |
| Males | 0.87 (0.40-1.89) | 0.737 | 1.01 (0.40-2.54) | 0.964 |  | 0.74(0.24-2.28) | 0.604 | 4.11(0.73-7.66) | 0.961 |
|  |  |  |  |  |  |  |  |  |  |  |
| **Seniority**  **(years)** | 5≤ | 1 |  | 1 |  |  | 1 |  | 1 |  |
| 5> | 1.38 (0.83-2.30) | 0.209 | 1.96 (1.2-3.81) | 0.044 |  | 1.12(0.57-2.19) | 0.742 | 0.07(0.01-0.49) | 0.007 |
|  |  |  |  |  |  |  |  |  |  |  |
| **Age**  **(years)** | 40> | 1 |  | 1 |  |  | 1 |  | 1 |  |
| 40≤ | 0.77(0.44-1.38) | 0.394 | 0.43(0.21-0.91) | 0.024 |  | 0.36(0.15-0.89) | 0.021 | 0.67(0.06-7.50) | 0.741 |
|  |  |  |  |  |  |  |  |  |  |  |
| **PCS** | ≥50 | 1 |  | 1 |  |  | 1 |  | 1 |  |
|  | <50 | 0.70(0.43-1.45) | 0.157 | 1.15(0.63-2.08) | 0.651 |  | 0.91(0.38-2.17) | 0.834 | 1.19(0.25-5.67) | 0.832 |
|  |  |  |  |  |  |  |  |  |  |  |
|  | ≥50 | 1 |  | 1 |  |  | 1 |  | 1 |  |
| **MCS** | <50 | 0.92(0.54-1.57) | 0.723 | 0.76(0.40-1.47) | 0.420 |  | 0.54(0.26-1.10) | 0.082 | 0.54(0.14-2.20) | 0.384 |
|  |  |  |  |  |  |  |  |  |  |  |
| **Level of PA** | High | 1 |  | 1 |  |  | 1 |  | 1 |  |
| Low | 0.59 (0.27-1.28) | 0.182 | 0.59(0.24-1.44) | 0.249 |  | 1.73(0.56-5.35) | 0.342 | 1.28(0.14-11.4) | 0.823 |
| Moderate | 0.45 (0.21-0.98) | 0.042 | 0.72(0.29-1.75) | 0.468 |  | 1.66(0.53-5.25) | 0.381 | 1.57(0.18-14.03) | 0.576 |
|  |  |  |  |  |  |  |  |  |  |  |
| **Sedentary behaviors** | No | 1 |  | 1 |  |  | 1 |  | 1 |  |
| Yes | 2.77 (1.61-4.74) | 0.0002 | 3.12(1.49-6.52) | 0.002 |  | 2.74(1.28-5.88) | 0.009 | 5.37(0.68-23.57) | 0.114 |

**Table 5** Associated factors of MSDs according to body regions

OR: odd ratio, CI: Confidence intervals, MSD-12M: Prevalence of musculoskeletal disorders during the last 12 months, MSDs-7d: Prevalence of Prevalence of musculoskeletal disorders during the7 last days, PCS: Physical component summary, MCS: Mental component summary, PA; Physical activity, MHT: Medical-health technicians.

**Table 5** Associated factors of MSD according to body regions (Continued)

|  |  | **Low back** | | | |  | **Hips/thigh** | |  | **Knees** | |
| --- | --- | --- | --- | --- | --- | --- | --- | --- | --- | --- | --- |
| **Parameters** | Categories | MSD-12M  OR(95%IC) | P-value | MSD-7d  OR(95%IC) | P-value |  | MSD-12M  OR(95%IC) | P-value |  | MSD-12M  OR(95%IC) | P-value |
| **Profession** | Nurses | 1 |  | 1 |  |  | 1 |  |  | 1 |  |
| MHT | 1.13(0.71-1.83) | 0.601 | 0.82(0.49-1.37) | 0.453 |  | 1.01 (0.36-2.82) | 0.972 |  | 0.58(0.34-0.99) | 0.041 |
|  |  |  |  |  |  |  |  |  |  |  |  |
| **Gender** | Females | 1 |  | 1 |  |  | 1 |  |  | 1 |  |
| Males | 0.43(0.20-0.91) | 0.022 | 0.51(0.21-1.22) | 0.131 |  | 0.45(0.07-2.24) | 0.731 |  | 0.60(0.24-1.53) | 0.418 |
|  |  |  |  |  |  |  |  |  |  |  |  |
| **Seniority**  **(years)** | 5≤ | 1 |  | 1 |  |  | 1 |  |  | 1 |  |
| 5> | 1.66(1.01-2.74) | 0.041 | 1.87(1.02-3.32) | 0.034 |  | 0.38 (0.13-1.09) | 0.072 |  | 0.55(0.33-0.98) | 0.024 |
|  |  |  |  |  |  |  |  |  |  |  |  |
| **Age**  **(years)** | 40≤ | 1 |  | 1 |  |  | 1 |  |  | 1 |  |
| 40> | 1.73(1.01-2.74) | 0.043 | 3.31(1.87-5.85) | <0.0001 |  | 0.44 (0.08-2.41) | 0.349 |  | 2.40(1.39-4.15) | 0.003 |
|  |  |  |  |  |  |  |  |  |  |  |  |
|  | ≥50 | 1 |  | 1 |  |  | 1 |  |  | 1 |  |
| **PCS** | <50 | 2.27(1.02-5.07) | 0.041 | 0.96(0.56-1.62) | 0.861 |  | 1.39(0.52-3.74) | 0.527 |  | 2.28(1.11-4.67) | 0.022 |
|  |  |  |  |  |  |  |  |  |  |  |  |
| **MCS** | ≥50 |  |  | 1 |  |  | 1 |  |  | 1 |  |
|  | <50 | 0.66(280-1.55) | 0.347 | 0.99(0.55-1.77) | 0.961 |  | 0.48(0.16-1.44) | 0.089 |  | 0.67(0.37-1.2 | 0.071 |
|  |  |  |  |  |  |  |  |  |  |  |  |
| **Level of PA** | High | 1 |  | 1 |  |  | 1 |  |  | 1 |  |
| Low | 0.55(0.24-1.27) | 0.159 | 0.95(0.56-1.61) | 0.831 |  | 0.83 (0.15-4.57) | 0.832 |  | 1.15(0.48-2.80) | 0.754 |
| Moderate | 0.41 (0.18-0.94) | 0.037 | 1.24(0.55-2.80) | 0.601 |  | 0.71 (0.12-4.12) | 0.701 |  | 1.37(0.56-3.32) | 0.483 |
|  |  |  |  |  |  |  |  |  |  |  |  |
| **Sedentary behaviors** | No | 1 |  | 1 |  |  | 1 |  |  | 1 |  |
| Yes | 0.77(0.46-1.29) | 0.323 | 1.02(0.59-1.77) | 0.961 |  | 0.72 (0.24-2.18) | 0.561 |  | 0.71(0.41-1.24) | 0.239 |

OR: odd ratio, CI; confidence intervals, MSD-12M: Prevalence of musculoskeletal disorders during the last 12 months, 7ds: Prevalence of Prevalence of musculoskeletal disorders during the7 last days, PCS: Physical component summary, MCS: Mental component summary, PA; Physical activity, MHT: Medical-health technicians.
